# Supplementary material for: Co-migration of hundreds of species over metres drives selection and promotes non-motile hitchhikers
Source: Research Square preprint supplement (doi:10.21203/rs.3.rs-5040873/v1), 2024-09-18
Supplement: Supplementary file 1 [file 04c28239bd40a954ae09b65f.xlsx]

## Sheet: Supplementary Table 2
Sewage Replicate 1
Distance							Speed							Speed (mean)
Time (hours)	Tube A	Tube B	Tube C	Tube D	Tube E		Time(hours)	Tube A	Tube B	Tube C	Tube D	Tube E		Time (hours)	Mean spped (cm/hr)	Standard deviation	Standard error of the mean
20	32.5			9.8			20							20
21	32.6	12	9.6	10.1	24.8		21	0.1			0.3			21
24	34.2		11.1	11.8			24	0.533333		0.5	0.566667			24	0.533333	0.0333333	0.019245
28	38.5		13.9	13.8	26.7		28	1.075		0.7	0.5			28	0.758333	0.291905	0.168531
32	91.6		15.7	16.4			32	13.275		0.45	0.65			32	4.79167	7.34746	4.24206
36			18.7	18.1	27.9		36			0.75	0.425			36
44	4.4	21.7	24.1	22.6	30.8		44			0.675	0.5625	0.3625		44	0.533333	0.158278	0.0913821
48	6.5	24.6	27.4	25.1	32.5		48	0.525	0.725	0.825	0.625	0.425		48	0.65	0.170783	0.0853913
52	9.2	27.1		27.6	34		52	0.675	0.625		0.625	0.375		52	0.541667	0.144338	0.0833333
56	11.1	29.4	34	30	35.9		56	0.475	0.575		0.6	0.475		56	0.55	0.0661438	0.0381881
60	14.4	32.1	37.4	32.3	38.2		60	0.825	0.675	0.85	0.575	0.575		60	0.66875	0.129703	0.0648516
68	19.6	37.5	43.9	37.9			68	0.65	0.675	0.8125	0.7			68	0.729167	0.0732433	0.042287
72	21.5	40.2	47.1	39.5			72	0.475	0.675	0.8	0.4			72	0.625	0.204634	0.118145
76	24.8	43.5	51.1	42.3			76	0.825	0.825	1	0.7			76	0.841667	0.150693	0.0870026
80	27.2	46.5	53.4	45	49.5		80	0.6	0.75	0.575	0.675			80	0.666667	0.0877971	0.0506897
84	31	49.5	56.6	48.5	51.1		84	0.95	0.75	0.8	0.875	0.4		84	0.70625	0.21053	0.105265
92	37.1	55.5	63.1	55	53		92	0.7625	0.75	0.8125	0.8125	0.2375		92	0.653125	0.278645	0.139323
96	40.2	58.2	66.8	58.6	55.5		96	0.775	0.675	0.925	0.9	0.625		96	0.78125	0.153263	0.0766316
100	43.1	61.1	70	62.1	57.8		100	0.725	0.725	0.8	0.875	0.575		100	0.74375	0.128087	0.0640434
104	46.3	64.2	73.4	65.6	60.4		104	0.8	0.775	0.85	0.875	0.65		104	0.7875	0.101036	0.0505181
108	48.7	67.1	76	69.2	62.8		108	0.6	0.725	0.65	0.9	0.6		108	0.71875	0.1313	0.0656498
116	55.2	73.2	82.6	76.4	68		116	0.8125	0.7625	0.825	0.9	0.65		116	0.784375	0.105759	0.0528793
120	58.5	76	85.4	80	70.4		120	0.825	0.7	0.7	0.9	0.6		120	0.725	0.125831	0.0629153
124	62.8	79			73		124	1.075	0.75			0.65		124
128	65.2	81.6			75.5		128	0.6	0.65			0.625		128
132	69	84.4			77.9		132	0.95	0.7			0.6		132
140	74.1	89.1	12.4		82.7		140	0.6375	0.5875			0.6		140
143.5	77.5	91.2	15.5	8.6	84.9		143.5	0.971429	0.6	0.885714		0.628571		143.5
Sewage Replicate 2
Distance							Speed							Speed (Mean)
Time (hours)	Tube A	Tube B	Tube C	Tube D	Tube E		Time (hours)	Tube A	Tube B	Tube C	Tube D	Tube E		Time (hours)	Mean	Standard Deviation	Standard error of the mean
19.5	29.3	22.6	94.5	68	45.9		19.5							19.5
23	30.1	23.6		69.6	47		23	0.228571	0.285714		0.457143	0.314286		23	0.321429	0.0972408	0.0486204
27	32	25.5		71.1	48.9		27	0.475	0.475		0.375	0.475		27	0.45	0.05	0.025
31		27.5		73.2	50.5		31		0.5		0.525	0.4		31	0.475	0.0661438	0.0381881
35		29.6	34.1	75.6	52.5		35		0.525		0.6	0.5		35	0.541667	0.0520416	0.0300463
43	53.4	34	37.6	80.2	56.1		43		0.55	0.4375	0.575	0.45		43	0.525	0.0661438	0.0330719
47	54.5	36.1	39	83	57.9		47	0.275	0.525	0.35	0.7	0.45		47	0.4875	0.176186	0.0880932
51	56.5	38.2	78.5	85.9	58.9		51	0.5	0.525	9.875	0.725	0.25		51	0.5	0.194722	0.097361
55	58.5	40.7	79.5	89.1	61.7		55	0.5	0.625	0.25	0.8	0.7		55	0.65625	0.12645	0.063225
59	60.9	43.6	81.9	92.2	63.7		59	0.6	0.725	0.6	0.775	0.5		59	0.65	0.124164	0.0877971
67		49	4.4		67.8		67		0.675			0.5125		67
71	66.1	51.8	7	4.4	71.4		71		0.7	0.65		0.9		71
75	68.8	54.9			74.1		75	0.675	0.775			0.675		75	0.708333	0.057735	0.0333333
79	71.3	58			76.9		79	0.625	0.775			0.7		79	0.7	0.075	0.0433013
83	73.6	61			79.9		83	0.575	0.75			0.75		83	0.691667	0.101036	0.0583333
91	78.5	67.6	40.4		85.2		91	0.6125	0.825			0.6625		91	0.7	0.111102	0.064145
95	81.5	71	42.7	44	88.5		95	0.75	0.85	0.575		0.825		95	0.808333	0.0520416	0.0300463
99	84.2	74.8	45.1		92		99	0.675	0.95	0.6		0.875		99	0.833333	0.142156	0.0820738
103	87.6	78.2	47.3	46	95.3		103	0.85	0.85	0.55		0.825		103	0.841667	0.0144338	0.00833333
107		81.2	49.6	47			107		0.75	0.575	0.25			107
115	6.7	88.9	53.4	49.3			115		0.9625	0.475	0.2875			115
120		91.4	55.9	50.4	25.1		120		0.5	0.5	0.22			120
123	51.2	93.4	56.6	51.1	27.5		123		0.666667	0.233333	0.233333	0.8		123
127	54.8		59.4	52.4	30.9		127	0.9		0.7	0.325	0.85		127
131	57.9		61.8	55.1	34.5		131	0.775		0.6	0.675	0.9		131
139	64.3	40.4	67.1	55.4	40.8		139	0.8		0.6625	0.0375	0.7875		139
143	67	42.8	69.4	56.5	44.1		143	0.675	0.6	0.575	0.275	0.825		143
147	69.8	45.9	72.2	57.6	47.4		147	0.7	0.775	0.7	0.275	0.825		147
151	72.8	49.1	75.1	58.8	50.9		151	0.75	0.8	0.725	0.3	0.875		151
155	75.9	52.2	77.8	59.7	54.3		155	0.775	0.775	0.675	0.225	0.85		155
163.5	83.2	58	83.4	62.1	60.6		163.5	0.858824	0.682353	0.658824	0.282353	0.741176		163.5
166.5	85.7	60.4		62.9	63.1		162	0.833333	0.8		0.266667	0.833333		162
170.5	89.1	63.3	87.9	64.3	66.4		166	0.85	0.725		0.35	0.825		166
172.15	90.6	64.5	89	64.8	67.5		168.25	0.909091	0.727273	0.666667	0.30303	0.666667		168.25
Sewage Replicate 3
Distance							Speed							Speed (Mean)
Time (hours)	Tube A	Tube B	Tube C	Tube D	Tube E		Time (hours)	Tube A	Tube B	Tube C	Tube D	Tube E		Time (hours)	Mean	Standard deviation	Standard error the the mean
19	7.6				10.7		19							19
20	8.1	7.6		11			20	0.5						20
24	10	9.5		12.9	17		24	0.475	0.475		0.475			24	0.475	0	0
27	11.9	11.6		14.8	18.2		27	0.633333	0.7		0.633333	0.4		27	0.591667	0.131586	0.0657929
31	13.9	12.5	2.7	16	19.7		31	0.5	0.225		0.3	0.375		31	0.35	0.11726	0.0586302
35	16.2	14.3	4.8	17.9	21.3		35	0.575	0.45	0.525	0.475	0.4		35	0.485	0.0675463	0.0302076
43	20.7	18.7	9.1	20.6	24.5		43	0.5625	0.55	0.5375	0.3375	0.4		43	0.4775	0.102088	0.045655
47	23.3	21.4	11.4	22.1	26.1		47	0.65	0.675	0.575	0.375	0.4		47	0.535	0.139866	0.06255
51	26.4	23.7	13.5	24	27.8		51	0.775	0.575	0.525	0.475	0.425		51	0.555	0.135093	0.0604152
55	30.1	27	16.4	25.9	29.4		55	0.925	0.825	0.725	0.475	0.4		55	0.67	0.225278	0.100747
59	33.4	29.4	18.6	27.3	31.1		59	0.825	0.6	0.55	0.35	0.425		59	0.55	0.182859	0.0817771
67	40.6	34.7	24	31.8	34.6		67	0.9	0.6625	0.675	0.5625	0.4375		67	0.6475	0.17034	0.0761782
71	44	37.5	27	34.9	36.6		71	0.85	0.7	0.75	0.775	0.5		71	0.715	0.131814	0.0589491
75	47.8	40	30.2	36.7	38.8		75	0.95	0.625	0.8	0.45	0.55		75	0.675	0.2	0.0894427
79	51	42.8	33.1	39.4	41		79	0.8	0.7	0.725	0.675	0.55		79	0.69	0.0911729	0.0407738
83	54.3	45	36.2	41.1	42.5		83	0.825	0.55	0.775	0.425	0.375		83	0.59	0.202793	0.0906918
91	61.1	50.4	42.1	45.8	47.9		91	0.85	0.675	0.7375	0.5875	0.675		91	0.705	0.0970663	0.0434094
95	65.1	53.5	45.4		50.4		95	1	0.775	0.825	0.625	0.625		95	0.77	0.156525	0.07
99	68.2	56.4	48.5	52.9	52.8		99	0.775	0.725	0.775	0.6	0.6		99	0.695	0.0890926	0.0398434
103	72.1	59.6	51.8	55	55.1		103	0.975	0.8	0.825	0.525	0.575		103	0.74	0.186748	0.0835165
107	75.8	62.5	54.8	57	57.4		107	0.925	0.725	0.75	0.5	0.575		107	0.695	0.165265	0.0739087
115	83.4	68.5	60.9	63	61.9		115	0.95	0.75	0.7625	0.75	0.5625		115	0.755	0.137102	0.0613137
119	87.6	71.9	64.1	66.6	64.2		119	1.05	0.85	0.8	0.9	0.575		119	0.835	0.172844	0.0772981
127		78	70.7	72.6	69.5		127		0.7625	0.825	0.75	0.6625		127	0.75	0.0669266	0.0334633
131	3.1	81.6	74.4	76.3	72.3		131		0.9	0.925	0.925	0.7		131	0.8625	0.108972	0.0544862
139	9.3	88.2	80.2	82.3	77.3		139	0.775	0.825	0.725	0.75	0.625		139	0.73125	0.0826009	0.0369403
143	12.5	91.6	83.6	85.6	79.8		143	0.8	0.85	0.85	0.825	0.625		143	0.7875	0.108972	0.048734
147	16.2	95.6	86.9	88.7	82.6		147	0.925	1	0.825	0.775	0.7		147	0.825	0.127475	0.0570088
151	19.5		90	91.6	85.5		151	0.825		0.775	0.725	0.725		151	0.741667	0.0288675	0.0144338
155	22.9	3.6			88.8		155	0.85				0.825		155
163	29.6	10.2		4.6	92.9		163	0.8375	0.825			0.5125		163
167	33	14.1	38.6	8.1	95.6		167	0.85	0.975		0.875	0.675		167
168	33.6	15	39.3	9	96.1		168	0.6	0.9	0.7	0.9	0.5		168

## Sheet: Supplementary Table 3
Community formation and long-term migration								Residual Community
Label	VLP1	LDNA	VMR	Sewage	Tube	Time (Hours)		Label	VLP1	LDNA	VMR	Order
R1 TA initial.fcs 1	2000000	530000	3.8	1	Innoculum	0		1.fcs	89000	86967000	0.00102338	1
R4 Initial 1.fcs 1	5440000	3050000	1.8	2	Innoculum	0		2.fcs	82000	85516500	0.000958879	1
R4 Initial 2.fcs 1	5620000	3160000	1.8	3	Innoculum	0		3.fcs	73000	89971000	0.000811373	1
R1 TA S1.fcs	7580000	1270000	6	1	A	3		1.fcs	179500	39324500	0.00456458	2
R1 TB S1.fcs	2360000	582000	4	1	B	3		2.fcs	146500	35644500	0.00411003	2
C1 1.fcs	1160000	722000	1.6	1	C	3		3.fcs	125500	39948000	0.00314158	2
R1 TD 1.fcs	6660000	1590000	4.2	1	D	3		1.fcs	24000	56018000	0.000428434	3
R1 TE 1.fcs	3180000	697000	4.6	1	E	3		2.fcs	28500	60302000	0.000472621	3
TA3 1.fcs	37700	23300	1.6	2	A	3		3.fcs	17500	58725000	0.000297999	3
TB3 1.fcs	227000	22200	10.2	2	B	3		1.fcs	104000	29826000	0.00348689	4
C3 1.fcs	502000	968000	0.5	2	C	3		2.fcs	110500	32639000	0.00338552	4
D3 1.fcs	357000	596000	0.6	2	D	3		3.fcs	68500	30366500	0.00225577	4
E3 1.fcs	1210000	1200000	1	2	E	3		1.fcs	83000	42595000	0.00194859	5
A4 1.fcs	102000	498000	0.2	3	A	3		2.fcs	69500	32875500	0.00211404	5
B4 1.fcs	96900	18600	5.2	3	B	3		3.fcs	74500	32221500	0.00231212	5
C4 1.fcs	300000	491000	0.6	3	C	3		1.fcs	307000	49085500	0.00625439	6
D4 1.fcs	161000	2850	56.4	3	D	3		2.fcs	195500	49604000	0.00394121	6
E4 1.fcs	105000	20500	5.1	3	E	3		3.fcs	288500	47833000	0.0060314	6
R1 TA S3.fcs	4680000	1050000	4.4	1	A	6		1.fcs	165000	34948500	0.00472123	7
B1 2.fcs	452000	106000	4.3	1	B	6		2.fcs	134000	35131000	0.0038143	7
C1 2.fcs	1090000	449000	2.4	1	C	6		3.fcs	126500	35703500	0.00354307	7
R1 TD 2.fcs	9110000	937000	9.7	1	D	6		1.fcs	102500	32843000	0.00312091	8
R1 TE 2.fcs	7220000	846000	8.5	1	E	6		2.fcs	70500	34744000	0.00202913	8
TA3 2.fcs	200000	27500	7.3	2	A	6		3.fcs	90500	30306000	0.00298621	8
TB3 2.fcs	1010000	1300000	0.8	2	B	6		1.fcs	189500	38968000	0.00486296	9
C3 2.fcs	838000	1500000	0.6	2	C	6		2.fcs	175000	38212500	0.00457965	9
D3 2.fcs	823000	1230000	0.7	2	D	6		3.fcs	154500	36054000	0.00428524	9
E3 2.fcs	7690000	2010000	3.8	2	E	6		1.fcs	611000	42677000	0.0143168	10
A4 2.fcs	131000	935000	0.1	3	A	6		2.fcs	737000	43280000	0.0170287	10
B4 2.fcs	586000	786000	0.7	3	B	6		3.fcs	1055500	44096000	0.0239364	10
C4 2.fcs	417000	939000	0.4	3	C	6		1.fcs	348000	31964000	0.0108872	11
D4 2.fcs	2400000	486000	4.9	3	D	6		2.fcs	228000	28089000	0.00811706	11
E4 2.fcs	1130000	405000	2.8	3	E	6		3.fcs	284000	28796500	0.00986231	11
R1 TA S2.fcs	7350000	746000	9.9	1	A	9		1.fcs	273500	28485500	0.00960138	12
B1 3.fcs	197000	255000	0.8	1	B	9		2.fcs	260500	26555000	0.00980983	12
C1 3.fcs	1910000	1960000	1	1	C	9		3.fcs	265500	25920500	0.0102429	12
R1 TD 3.fcs	7250000	3750000	1.9	1	D	9		1.fcs	667000	36951500	0.0180507	13
R1 TE 3.fcs	4680000	1380000	3.4	1	E	9		2.fcs	481000	32616500	0.0147471	13
TA3 3.fcs	261000	532000	0.5	2	A	9		3.fcs	376500	29418000	0.0127983	13
TB3 3.fcs	647000	1160000	0.6	2	B	9		1.fcs	381500	27261000	0.0139944	14
C3 3.fcs	256000	1580000	0.2	2	C	9		2.fcs	259500	23921000	0.0108482	14
D3 3.fcs	527000	2000000	0.3	2	D	9		3.fcs	239000	23022000	0.0103814	14
E3 3.fcs	3610000	1440000	2.5	2	E	9		1.fcs	477000	27331500	0.0174524	15
A4 3.fcs	107000	1290000	0.1	3	A	9		2.fcs	453000	25774500	0.0175755	15
B4 3.fcs	181000	938000	0.2	3	B	9		3.fcs	326000	23650000	0.0137844	15
C4 3.fcs	349000	1200000	0.3	3	C	9		1.fcs	569500	24855500	0.0229124	16
D4 3.fcs	3150000	503000	6.3	3	D	9		2.fcs	441500	19703500	0.0224072	16
E4 3.fcs	96000	5600	17.1	3	E	9		3.fcs	240000	12996000	0.0184672	16
R1 TA S4.fcs	6670000	3560000	1.9	1	A	12		1.fcs	37000	5558000	0.00665707	17
R1 TB S4.fcs	5570000	2730000	2	1	B	12		2.fcs	60000	5007000	0.0119832	17
C1 4.1.fcs	7700000	6020000	1.3	1	C	12		3.fcs	54500	4925000	0.011066	17
R1 TD 4.fcs	10300000	15800000	0.7	1	D	12		1.fcs	231500	16111000	0.0143691	17
R1 TE 4.fcs	3360000	8480000	0.4	1	E	12		2.fcs	298000	18302500	0.0162819	17
TA3 4.fcs	180000	1290000	0.1	2	A	12		3.fcs	123500	14376500	0.00859041	17
TB3 4.fcs	185000	832000	0.2	2	B	12		1.fcs	1165000	26096000	0.0446429	19
C3 4.fcs	135000	1690000	0.1	2	C	12		2.fcs	1160000	30546000	0.0379755	19
D3 4.fcs	86000	3220	26.7	2	D	12		3.fcs	974000	30144500	0.032311	19
E3 4.fcs	2280000	14500000	0.2	2	E	12		1.fcs	306000	21012000	0.0145631	20
A4 4.fcs	48700	2610000	0	3	A	12		2.fcs	385500	24832500	0.015524	20
B4 4.fcs	85500	1570000	0.1	3	B	12		3.fcs	271000	18963000	0.014291	20
C4 4.fcs	952000	1270000	0.8	3	C	12		1.fcs	210000	15224500	0.0137936	21
D4 4.fcs	829000	2890000	0.3	3	D	12		2.fcs	194500	15237000	0.012765	21
E4 4.fcs	1400	575	2.4	3	E	12		3.fcs	101000	10779500	0.00936964	21
R1 TA S5.fcs	5110000	13100000	0.4	1	A	15		1.fcs	170500	9800500	0.0173971	22
R1 TB S5.fcs	2250000	7510000	0.3	1	B	15		2.fcs	120500	7804500	0.0154398	22
C1 5.fcs	2790000	2450000	1.1	1	C	15		3.fcs	128000	7189500	0.0178037	22
R1 TD 5.fcs	1130000	3930000	0.3	1	D	15		1.fcs	88000	5270500	0.0166967	23
R1 TE 5.fcs	2590000	14600000	0.2	1	E	15		2.fcs	150500	7807000	0.0192776	23
TA3 5.fcs	239000	2660000	0.1	2	A	15		3.fcs	86500	5179500	0.0167005	23
TB3 5.fcs	216000	2240000	0.1	2	B	15		1.fcs	988500	12781500	0.0773383	24
C3 5.fcs	3770000	16200000	0.2	2	C	15		2.fcs	202500	7202500	0.0281152	24
D3 5.fcs	108000	1920000	0.1	2	D	15		3.fcs	190500	6160500	0.0309228	24
E3 5.fcs	290000	943000	0.3	2	E	15		1.fcs	91000	3947000	0.0230555	25
A4 5.fcs	116000	3760000	0	3	A	15		2.fcs	780500	11129500	0.0701289	25
B4 5.fcs	316000	2750000	0.1	3	B	15		3.fcs	95000	5143000	0.0184717	25
C4 5.fcs	645000	2520000	0.3	3	C	15		1.fcs	220000	3383000	0.065031	26
D4 5.fcs	1610000	2630000	0.6	3	D	15		2.fcs	282000	4320500	0.0652702	26
E4 5.fcs	109000	6470	16.9	3	E	15		3.fcs	101000	2677000	0.0377288	26
R1 TA S6.fcs	966000	1590000	0.6	1	A	18		1.fcs	52500	3417000	0.0153644	27
R1 TB S6.fcs	6790000	29800000	0.2	1	B	18		2.fcs	38000	2624500	0.0144789	27
C1 6.fcs	1910000	5700000	0.3	1	C	18		3.fcs	40500	3055500	0.0132548	27
R1 TD 6.fcs	659000	6650000	0.1	1	D	18		1.fcs	-12500	1689000	-0.00740083	28
R1 TE 6.fcs	9560000	27400000	0.3	1	E	18		2.fcs	-3500	1752500	-0.00199715	28
TA3 6.fcs	1720000	6960000	0.2	2	A	18		3.fcs	-7500	1864500	-0.00402253	28
TB3 6.fcs	15700000	20500000	0.8	2	B	18		1.fcs	-14500	1425500	-0.0101719	band
C3 6.fcs	5400000	24900000	0.2	2	C	18		2.fcs	-17500	864000	-0.0202546	band
D3 6.fcs	1310000	7010000	0.2	2	D	18		3.fcs	-23500	496000	-0.047379	band
E3 6.fcs	5260000	22400000	0.2	2	E	18		1.fcs	-18500	110500	-0.167421	29
A4 6.fcs	99300	4180000	0	3	A	18		2.fcs	-6500	155000	-0.0419355	29
B4 6.fcs	1960000	7170000	0.3	3	B	18		3.fcs	-17500	65500	-0.267176	29
C4 6.fcs	4830000	21000000	0.2	3	C	18		1.fcs	-10000	138000	-0.0724638	30
D4 6.1.fcs	21800000	76000000	0.3	3	D	18		2.fcs	-20500	82500	-0.248485	30
E4 6.fcs	2970000	1400000	2.1	3	E	18		3.fcs	-19500	5000	-3.9	30
R1 TA S7.fcs	189000	2000000	0.1	1	A	21
R1 TB S7.fcs	23700000	9530000	2.5	1	B	21
C1 7.fcs	1960000	6320000	0.3	1	C	21
R1 TD 7.fcs	5990000	15700000	0.4	1	D	21
R1 TE 7.fcs	2280000	20400000	0.1	1	E	21
A2 7.fcs	18900000	21100000	0.9	2	A	21
B2 7.fcs	5670000	15400000	0.4	2	B	21
C2 7.fcs	1720000	10400000	0.2	2	C	21
D2 7.fcs	1190000	8660000	0.1	2	D	21
E2 7.fcs	287000	4000000	0.1	2	E	21
A4 7.fcs	997000	5640000	0.2	3	A	21
B4 7.fcs	2200000	6900000	0.3	3	B	21
C4 7.fcs	1990000	6770000	0.3	3	C	21
D4 7.fcs	1770000	9780000	0.2	3	D	21
E4 7.fcs	455000	2420000	0.2	3	E	21
A3 7.fcs	2110000	1880000	1.12	1	A	168
B3 7.fcs	1530000	565000	2.72	1	B	168
C3 7.fcs	1030000	170000	6.05	1	C	168
D3 7.fcs	859000	117000	7.33	1	D	168
E3 7.fcs	393000	26700	14.8	1	E	168
A1 End.fcs	9080	501000	0.0181	2	A	168
A2 End.fcs	5530000	109000	50.9	2	B	168
B1 End.fcs	1020000	1780000	0.576	2	C	168
B2 End.fcs	2740000	366000	7.48	2	D	168
C1 End.fcs	62400	1470000	0.0424	2	E	168
C2 End.fcs	453000	50900	8.9	3	A	168
D1 End.fcs	2220000	382000	5.82	3	B	168
D2 End.fcs	77700	1380000	0.0564	3	C	168
E1 End.fcs	345000	738000	0.467	3	D	168
E2 End.fcs	161000	232000	0.693	3	E	168
Population means: Community formation and long-term migration
Time (hours)	VLP1	LDNA	VMR
0	4.35333e+06	2.24667e+06	2.46667
3	1.60257e+06	580097	6.78667
6	2.51847e+06	867100	3.42667
9	2.03807e+06	1.24931e+06	3.00667
12	2558840	4.21639e+06	2.48
15	1.41927e+06	5.14796e+06	5.14796e+06
18	5395620	1.75107e+07	0.4
21	4.61987e+06	9668000	0.42
168	1236012	651173	7.13153

## Sheet: Supplementary Table 7
Level 3 Subsystem	log2FoldChange	pvalue	padj
Salmochelin-mediated Iron Acquisition	-8.136	3.684e-75	5.255e-73
Fructoselysine (Amadori product) utilization pathway	-7.723	5.723e-25	1.232e-23
Periplasmic Acid Stress Response in Enterobacteria	-7.667	9.611e-33	4.061e-31
Colonization factor antigen I fimbriae	-7.601	5.83e-222	3.33e-219
EC 3.4.24.- Metalloendopeptidases	-7.587	1.824e-31	6.939e-30
(GlcNAc)2 Catabolic Operon	-7.583	1.921e-40	1.096e-38
Phosphoglycerate transport system	-7.496	7.46e-193	2.84e-190
Phage Family Inoviridae	-7.466	9.941e-20	1.418e-18
Accessory colonization factor	-7.459	4.846e-46	3.456e-44
Carnitine Metabolism in Microorganisms	-7.429	1.73e-175	4.93e-173
Riboflavin transporters	-7.422	6.251e-25	1.321e-23
Cytolysin and Lipase operon in Vibrio	-7.26	9.277e-28	2.861e-26
CBSS-344610.3.peg.2335	-7.239	2.59e-82	4.221e-80
Biogenesis of cbb3-type cytochrome c oxidases	-7.185	5.211e-68	5.405e-66
Additional flagellar genes in Vibrionales	-7.178	6.098e-28	1.933e-26
Adhesins in Staphylococcus	-7.126	2.988e-34	1.364e-32
Aminoglycoside adenylyltransferases	-7.073	3.519e-24	7.171e-23
beta-glucuronide utilization	-7.043	7.978e-33	3.501e-31
Acyl Homoserine Lactone (AHL) Autoinducer Quorum Sensing_	-7.043	1.406e-46	1.069e-44
A toxin-antitoxin module cotranscribed with DinB	-7.002	5.846e-18	7.172e-17
Streptococcal Mga Regulon	-6.948	7.558e-22	1.268e-20
Choline Transport	-6.945	3.439e-29	1.121e-27
Vibrio Core Oligosaccharide Biosynthesis	-6.945	9.298e-62	8.161e-60
Rhombosortase	-6.926	2.539e-31	9.346e-30
Mannose-sensitive hemagglutinin type 4 pilus	-6.875	3.531e-48	2.878e-46
Tricarballylate Utilization	-6.865	7.796e-26	1.977e-24
Naphtalene and antracene degradation	-6.865	4.499e-24	8.851e-23
Siderophore Yersiniabactin Biosynthesis	-6.793	8.654e-27	2.408e-25
CBSS-498211.3.peg.1514	-6.753	6.728e-30	2.326e-28
Transposase in enterics	-6.728	1.321e-42	7.931e-41
Sortase	-6.696	2.985e-65	2.838e-63
Unknown carbohydrate utilization containing Fructose-bisphosphate aldolase	-6.675	1.246e-35	6.181e-34
Tricarboxylate transport system	-6.644	4.601e-32	1.875e-30
Gallic acid utilization	-6.623	3.867e-24	7.742e-23
Listeria surface proteins: Internalin-like proteins	-6.601	4.422e-71	5.045e-69
Phosphonate metabolism	-6.522	5.11e-25	1.143e-23
CBSS-232721.5.peg.360	-6.519	1.756e-23	3.284e-22
Glutamate transporter involved in acid tolerance in Streptococcus	-6.474	3.23e-23	5.944e-22
MexE-MexF-OprN Multidrug Efflux System	-6.425	4.951e-23	8.826e-22
Mycobacterial gene cluster associated with resistance against FAS-II antibiotics	-6.418	1.135e-19	1.598e-18
tRNA splicing	-6.392	1.34e-21	2.216e-20
VC0266	-6.223	1.388e-43	8.798e-42
EC 5.1.2.- Racemaces and epimerases acting on hydroxy acids and derivatives	-6.148	1.161e-34	5.521e-33
Alkaloid biosynthesis from L-lysine	-6.117	8.991e-32	3.538e-30
Group II intron-associated genes	-6.064	1.802e-26	4.782e-25
CBSS-279010.5.peg.3195	-6.046	4.591e-25	1.048e-23
Dimethylsulfoniopropionate (DMSP) mineralization, WBW	-5.935	6.712e-24	1.276e-22
Dimethylsulfoniopropionate (DMSP) mineralization, gjo	-5.935	6.712e-24	1.276e-22
D-allose utilization	-5.933	3.322e-21	5.339e-20
Mercury resistance operon	-5.876	3.402e-25	8.087e-24
Pyrroloquinoline Quinone biosynthesis	-5.847	1.543e-19	2.122e-18
HMG CoA Synthesis	-5.846	8.21e-21	1.249e-19
Ubiquinone Menaquinone-cytochrome c reductase complexes	-5.81	3.088e-25	7.66e-24
Sporulation Cluster	-5.753	9.675e-19	1.244e-17
CBSS-222523.1.peg.1311	-5.72	3.571e-20	5.224e-19
Gram Positive Competence	-5.601	3.87e-22	6.69e-21
Denitrification	-5.58	4.601e-20	6.646e-19
Sucrose-specific PTS	-5.557	4.768e-27	1.36e-25
Control of cell elongation - division cycle in Bacilli	-5.508	3.276e-25	7.954e-24
Beta-lactamase cluster in Streptococcus	-5.503	3.623e-27	1.06e-25
Zinc resistance	-5.498	2.411e-38	1.31e-36
Polyglycerolphosphate lipoteichoic acid biosynthesis	-5.495	5.112e-21	8.1e-20
Late competence	-5.488	1.509e-21	2.459e-20
EC 3.4.21.- Serine endopeptidase	-5.461	1.41e-19	1.961e-18
A Gram-positive cluster that relates ribosomal protein L28P to a set of uncharacterized proteins	-5.347	2.129e-26	5.52e-25
ECF class transporters	-5.298	7.959e-21	1.227e-19
Cadmium resistance	-5.271	5.296e-25	1.162e-23
Cell Division Cluster	-5.148	1.236e-20	1.856e-19
Cell envelope-associated LytR-CpsA-Psr transcriptional attenuators	-5.09	5.987e-21	9.357e-20
Peripheral Glucose Catabolism Pathways	-5.087	2.405e-27	7.22e-26
Phenylpropionate Degradation	-5.053	8.499e-30	2.852e-28
Fructose and Mannose Inducible PTS	-4.974	3.851e-30	1.373e-28
Mycobacterium virulence operon involved in an unknown function with a Jag Protein and YidC and YidD	-4.835	9.701e-19	1.244e-17
Streptococcus pyogenes Virulome	-4.736	2.314e-19	3.106e-18
LMPTP YwlE cluster	-4.642	5.166e-19	6.775e-18
Competence in Streptococci	-4.567	4.233e-25	9.857e-24
Widespread colonization island	-4.157	1.013e-22	1.779e-21
CBSS-314267.3.peg.390	-4.13	2.472e-19	3.28e-18
Glycerol fermentation to 1,3-propanediol	-3.082	4.688e-89	8.914e-87
Hydrogenases	-2.383	9.395e-74	1.191e-71
Propanediol utilization	-2.137	8.86e-307	1.01e-303
Coenzyme B12 biosynthesis	-1.926	1.527e-20	2.263e-19
Cinnamic Acid Degradation	-1.791	3.29e-18	4.125e-17
CBSS-196164.1.peg.1690	-1.659	7.298e-45	4.899e-43
ABC transporter branched-chain amino acid (TC 3.A.1.4.1)	0.572	1.099e-26	2.986e-25
Alkylphosphonate utilization	0.579	6.994e-18	8.489e-17
Bacterial Chemotaxis	0.6	7.493e-22	1.268e-20
Pyrimidine utilization	0.666	3.907e-23	7.076e-22
p-Aminobenzoyl-Glutamate Utilization	0.907	1.005e-24	2.085e-23
Autoinducer 2 (AI-2) transport and processing (lsrACDBFGE operon)	1.168	1.411e-36	7.317e-35
Malonate decarboxylase	1.519	7.25e-120	1.65e-117
Two partner secretion pathway (TPS)	1.822	5.609e-18	6.957e-17

## Sheet: Supplementary Table 9
Protein Name	Category
Chemotaxis protein CheC -- inhibitor of MCP methylation	Chemotaxis Signal Transduction Proteins
Chemotaxis protein CheD	Chemotaxis Signal Transduction Proteins
Chemotaxis protein CheV (EC 2.7.3.-)	Chemotaxis Signal Transduction Proteins
Chemotaxis protein CheX	Chemotaxis Signal Transduction Proteins
Signal transduction histidine kinase CheA	Chemotaxis Signal Transduction Proteins
Positive regulator of CheA protein activity (CheW)	Chemotaxis Signal Transduction Proteins
Chemotaxis protein methyltransferase CheR (EC 2.1.1.80)	Chemotaxis Regulatory Proteins
Chemotaxis regulator - transmits chemoreceptor signals to flagellar motor components CheY	Chemotaxis Regulatory Proteins
Chemotaxis response - phosphatase CheZ	Chemotaxis Regulatory Proteins
Chemotaxis response regulator protein-glutamate methylesterase CheB (EC 3.1.1.61)	Chemotaxis Regulatory Proteins
Flagellar motor rotation protein MotA	Flagellar Motor Proteins
Flagellar motor rotation protein MotB	Flagellar Motor Proteins
Flagellar motor switch protein FliG	Flagellar Motor Proteins
Flagellar motor switch protein FliM	Flagellar Motor Proteins
Flagellar motor switch protein FliN	Flagellar Motor Proteins
Flagellar assembly protein FliH	Flagellar Assembly Proteins
Flagellar basal body-associated protein FliL	Flagellar Assembly Proteins
Flagellar basal-body P-ring formation protein FlgA	Flagellar Assembly Proteins
Flagellar basal-body rod modification protein FlgD	Flagellar Assembly Proteins
Flagellar hook-basal body complex protein FliE	Flagellar Assembly Proteins
Flagellar hook-length control protein FliK	Flagellar Assembly Proteins
Flagellar L-ring protein FlgH	Flagellar Structural Proteins
Flagellar M-ring protein FliF	Flagellar Structural Proteins
Flagellar P-ring protein FlgI	Flagellar Structural Proteins
Flagellar basal-body rod protein FlgB	Flagellar Structural Proteins
Flagellar basal-body rod protein FlgC	Flagellar Structural Proteins
Flagellar basal-body rod protein FlgF	Flagellar Structural Proteins
Flagellar basal-body rod protein FlgG	Flagellar Structural Proteins
Flagellar cap protein FliD	Flagellar Structural Proteins
Flagellar hook protein FlgE	Flagellar Structural Proteins
Flagellar hook-associated protein FlgK	Flagellar Structural Proteins
Flagellar hook-associated protein FlgL	Flagellar Structural Proteins
Flagellin FliC	Flagellar Structural Proteins
Flagellar biosynthesis protein FlgN	Flagellar Biosynthesis Proteins
Flagellar biosynthesis protein FlhA	Flagellar Biosynthesis Proteins
Flagellar biosynthesis protein FlhB	Flagellar Biosynthesis Proteins
Flagellar biosynthesis protein FliO	Flagellar Biosynthesis Proteins
Flagellar biosynthesis protein FliP	Flagellar Biosynthesis Proteins
Flagellar biosynthesis protein FliQ	Flagellar Biosynthesis Proteins
Flagellar biosynthesis protein FliR	Flagellar Biosynthesis Proteins
Flagellar biosynthesis protein FliS	Flagellar Biosynthesis Proteins
Flagellar biosynthesis protein FliT	Flagellar Biosynthesis Proteins
Flagellar regulator flk	Flagellar Regulators
Flagellar transcriptional activator FlhC	Flagellar Regulators
Flagellar transcriptional activator FlhD	Flagellar Regulators
LysR family transcriptional regulator HdfR	Flagellar Regulators
Negative regulator of flagellin synthesis FlgM (anti-sigma28)	Flagellar Regulators
RNA polymerase sigma factor for flagellar operon	Flagellar Regulators
Regulator of sigma S factor FliZ	Flagellar Regulators
Flagellar protein FlgJ [peptidoglycan hydrolase]	Flagellar-Related Enzymes
Flagellum-specific ATP synthase FliI	Flagellar-Related Enzymes
Flagellar protein FliJ	Flagellar-Related Enzymes
Flagellar brake protein YcgR	Flagellar Function Modulators
Flagellar protein FlhE	Flagellar Function Modulators

## Sheet: Supplementary Table 10
Bacteria Two-way ANOVA
	Df	Sum Sq	Mean Sq	F value	Pr(>F)
Time	8	3750000000000000	468800000000000	7.659	6.96e-08
Sewage	2	27970000000000	13980000000000	0.228	0.796
Time:Sewage	16	400700000000000	25050000000000	0.409	0.977
Residuals	96	5876000000000000	61200000000000
Bacteria Tukey Post-hoc test
	diff	lwr	upr	padj
3-0	-1666570	-1.73697e+07	1.40366e+07	0.999995
6-0	-1.37957e+06	-1.70827e+07	1.43236e+07	0.999999
9-0	-997360	-1.67005e+07	1.47058e+07	1
12-0	1.96972e+06	-1.37334e+07	1.76729e+07	0.999981
15-0	2901298	-1.28018e+07	1.86044e+07	0.999639
18-0	15264000	-439142	3.09671e+07	0.0634845
21-0	7.42133e+06	-8.28181e+06	2.31245e+07	0.85295
168-0	-1.59549e+06	-1.72986e+07	1.41076e+07	0.999996
2024-03-06	287003	-8.77921e+06	9.35322e+06	1
2024-03-09	669210	-8.397e+06	9.73542e+06	1
2024-03-12	3.63629e+06	-5.42992e+06	1.27025e+07	0.936753
2024-03-15	4567868	-4.49835e+06	1.36341e+07	0.803045
2024-03-18	16930570	7.86436e+06	2.59968e+07	1.70374e-06
2024-03-21	9.0879e+06	21690.1	1.81541e+07	0.0489706
168-3	71076.7	-8.99514e+06	9.13729e+06	1
2024-06-09	382207	-8.68401e+06	9.44842e+06	1
2024-06-12	3.34929e+06	-5.71693e+06	1.24155e+07	0.960375
2024-06-15	4.28086e+06	-4.78535e+06	1.33471e+07	0.853574
2024-06-18	1.66436e+07	7.57735e+06	2.57098e+07	2.65467e-06
2024-06-21	8800900	-265313	1.78671e+07	0.0641796
168-6	-215927	-9.28214e+06	8.85029e+06	1
2024-09-12	2.96708e+06	-6.09913e+06	1.20333e+07	0.980998
2024-09-15	3898658	-5.16756e+06	1.29649e+07	0.908087
2024-09-18	16261360	7.19515e+06	2.53276e+07	4.76576e-06
2024-09-21	8.41869e+06	-647520	1.74849e+07	0.0904882
168-9	-598133	-9.66435e+06	8.46808e+06	1
2024-12-15	931578	-8.13463e+06	9.99779e+06	0.999996
2024-12-18	1.32943e+07	4.22807e+06	2.23605e+07	0.000346455
2024-12-21	5.45161e+06	-3.6146e+06	1.45178e+07	0.609729
168-12	-3565213	-1.26314e+07	5.501e+06	0.943327
18-15	12362702	3.29649e+06	2.14289e+07	0.00118659
21-15	4.52004e+06	-4.54618e+06	1.35862e+07	0.811998
168-15	-4.49679e+06	-1.3563e+07	4.56942e+06	0.816275
21-18	-7.84267e+06	-1.69089e+07	1.22355e+06	0.146186
168-18	-1.68595e+07	-2.59257e+07	-7.79328e+06	1.90213e-06
168-21	-9.01683e+06	-1.8083e+07	49386.6	0.0524139
VLP Two-way ANOVA
	Df	Sum Sq	Mean Sq	F value	Pr(>F)
Time	8	254600000000000	31830000000000	2.199	0.03403
Sewage	2	160600000000000	80310000000000	5.548	0.00525
Time:Sewage	16	210400000000000	13150000000000	0.908	0.56199
Residuals	96	1390000000000000	14480000000000
VLP Tukey Post-hoc test
	diff	lwr	upr	padj
3-0	-2750760	-1.0388e+07	4.88651e+06	0.965878
6-0	-1.83487e+06	-9.47214e+06	5.8024e+06	0.997589
9-0	-2.31527e+06	-9.95254e+06	5.322e+06	0.988342
12-0	-1.79449e+06	-9.43176e+06	5.84278e+06	0.997939
15-0	-2.93407e+06	-1.05713e+07	4.7032e+06	0.950323
18-0	1.04229e+06	-6.59498e+06	8.67956e+06	0.999963
21-0	266533	-7.37074e+06	7.9038e+06	1
168-0	-3.11732e+06	-1.07546e+07	4.51995e+06	0.930377
2024-03-06	915893	-3.49349e+06	5.32527e+06	0.999148
2024-03-09	435493	-3.97389e+06	4.84487e+06	0.999997
2024-03-12	956267	-3.45311e+06	5.36565e+06	0.998836
2024-03-15	-183307	-4.59269e+06	4.22607e+06	1
2024-03-18	3.79305e+06	-616334	8.20243e+06	0.151309
2024-03-21	3.01729e+06	-1.39209e+06	7.42667e+06	0.432281
168-3	-366561	-4.77594e+06	4.04282e+06	0.999999
2024-06-09	-480400	-4.88978e+06	3.92898e+06	0.999994
2024-06-12	40373.3	-4.36901e+06	4.44975e+06	1
2024-06-15	-1099200	-5.50858e+06	3.31018e+06	0.996879
2024-06-18	2.87715e+06	-1.53223e+06	7.28653e+06	0.499079
2024-06-21	2101400	-2.30798e+06	6.51078e+06	0.847028
168-6	-1.28245e+06	-5.69183e+06	3.12693e+06	0.991113
2024-09-12	520773	-3.88861e+06	4.93015e+06	0.999988
2024-09-15	-618800	-5.02818e+06	3.79058e+06	0.999955
2024-09-18	3.35755e+06	-1.05183e+06	7.76693e+06	0.287166
2024-09-21	2581800	-1.82758e+06	6.99118e+06	0.643522
168-9	-802055	-5.21143e+06	3.60733e+06	0.999679
2024-12-15	-1.13957e+06	-5.54895e+06	3.26981e+06	0.995995
2024-12-18	2836780	-1.5726e+06	7.24616e+06	0.518748
2024-12-21	2.06103e+06	-2.34835e+06	6.47041e+06	0.86048
168-12	-1322828	-5.73221e+06	3.08655e+06	0.989108
18-15	3.97635e+06	-433027	8.38573e+06	0.111405
21-15	3200600	-1.20878e+06	7.60998e+06	0.350421
168-15	-183255	-4.59263e+06	4.22613e+06	1
21-18	-775753	-5.18513e+06	3.63363e+06	0.999749
168-18	-4159608	-8.56899e+06	249772	0.0804016
168-21	-3.38385e+06	-7.79323e+06	1.02553e+06	0.277272
VMR Two-way ANOVA
	Df	Sum Sq	Mean Sq	F value	Pr(>F)
Time	8	717	89.6	1.51	0.164
Sewage	2	10	5.02	0.085	0.919
Time:Sewage	16	715	44.71	0.753	0.733
Residuals	96	5697	59.34
VMR Tukey Post-hoc
	diff	lwr	upr	padj
3-0	4.32	-11.1423	19.7823	0.993199
6-0	0.96	-14.5023	16.4223	1
9-0	0.54	-14.9223	16.0023	1
12-0	0.0133333	-15.449	15.4757	1
15-0	-1.06667	-16.529	14.3957	1
18-0	-2.06667	-17.529	13.3957	0.999969
21-0	-2.04667	-17.509	13.4157	0.999971
168-0	4.66486	-10.7975	20.1272	0.988703
2024-03-06	-3.36	-12.2872	5.56719	0.955838
2024-03-09	-3.78	-12.7072	5.14719	0.915241
2024-03-12	-4.30667	-13.2339	4.62052	0.838081
2024-03-15	-5.38667	-14.3139	3.54052	0.605226
2024-03-18	-6.38667	-15.3139	2.54052	0.370255
2024-03-21	-6.36667	-15.2939	2.56052	0.374579
168-3	0.34486	-8.58233	9.27205	1
2024-06-09	-0.42	-9.34719	8.50719	1
2024-06-12	-0.946667	-9.87386	7.98052	0.999995
2024-06-15	-2.02667	-10.9539	6.90052	0.998385
2024-06-18	-3.02667	-11.9539	5.90052	0.976334
2024-06-21	-3.00667	-11.9339	5.92052	0.977282
168-6	3.70486	-5.22233	12.632	0.923835
2024-09-12	-0.526667	-9.45386	8.40052	1
2024-09-15	-1.60667	-10.5339	7.32052	0.999703
2024-09-18	-2.60667	-11.5339	6.32052	0.99088
2024-09-21	-2.58667	-11.5139	6.34052	0.991332
168-9	4.12486	-4.80233	13.052	0.868037
2024-12-15	-1.08	-10.0072	7.84719	0.999986
2024-12-18	-2.08	-11.0072	6.84719	0.998058
2024-12-21	-2.06	-10.9872	6.86719	0.998187
168-12	4.65153	-4.27566	13.5787	0.772468
18-15	-1	-9.92719	7.92719	0.999992
21-15	-0.98	-9.90719	7.94719	0.999993
168-15	5.73153	-3.19566	14.6587	0.521595
21-18	0.02	-8.90719	8.94719	1
168-18	6.73153	-2.19566	15.6587	0.299747
168-21	6.71153	-2.21566	15.6387	0.303613

## Sheet: Supplementary Table 11
Environment/host	sample type	project location (long/lat)	microbial/viral	Sample_Name	DNA_Concentration_(ng/µl)	Sample_Date	Tube	Sewage_Collection_Date	Sample_Time_(Hrs)	Distance_Travelled_(cm)	Neat/Dilute	Sequencing_Type
glenelg_wastewater	sewage	34°57'49"S 138°30'38"E	microbial	A1_cf_3h	0	2021-04-13	A1	2021-04-13	3	0	Dilute	16S
glenelg_wastewater	sewage	34°57'49"S 138°30'38"E	microbial	A1_cf_6h	0	2021-04-13	A1	2021-04-13	6	0	Dilute	16S
glenelg_wastewater	sewage	34°57'49"S 138°30'38"E	microbial	A1_cf_9h	0.00978	2021-04-13	A1	2021-04-13	9	0	Dilute	16S
glenelg_wastewater	sewage	34°57'49"S 138°30'38"E	microbial	A1_cf_12h	0.0744	2021-04-14	A1	2021-04-13	12	15	Dilute	16S
glenelg_wastewater	sewage	34°57'49"S 138°30'38"E	microbial	A1_cf_15h	0.354	2021-04-14	A1	2021-04-13	15	19	Dilute	16S
glenelg_wastewater	sewage	34°57'49"S 138°30'38"E	microbial	A1_cf_18h	0.636	2021-04-14	A1	2021-04-13	18	27	Dilute	16S
glenelg_wastewater	sewage	34°57'49"S 138°30'38"E	microbial	B1_cf_3h	0.0448	2021-04-13	B1	2021-04-13	3	0	Dilute	16S
glenelg_wastewater	sewage	34°57'49"S 138°30'38"E	microbial	B1_cf_6h	0	2021-04-13	B1	2021-04-13	6	0	Dilute	16S
glenelg_wastewater	sewage	34°57'49"S 138°30'38"E	microbial	B1_cf_9h	0.0122	2021-04-13	B1	2021-04-13	9	0	Dilute	16S
glenelg_wastewater	sewage	34°57'49"S 138°30'38"E	microbial	B1_cf_12h	0.00888	2021-04-14	B1	2021-04-13	12	9	Dilute	16S
glenelg_wastewater	sewage	34°57'49"S 138°30'38"E	microbial	B1_cf_15h	0.15	2021-04-14	B1	2021-04-13	15	18	Dilute	16S
glenelg_wastewater	sewage	34°57'49"S 138°30'38"E	microbial	B1_cf_18h	1.37	2021-04-14	B1	2021-04-13	18	18	Dilute	16S
glenelg_wastewater	sewage	34°57'49"S 138°30'38"E	microbial	E1_cf_3h	0.00852	2021-04-13	E1	2021-04-13	3	0	Dilute	16S
glenelg_wastewater	sewage	34°57'49"S 138°30'38"E	microbial	E1_cf_6h	0.017	2021-04-13	E1	2021-04-13	6	0	Dilute	16S
glenelg_wastewater	sewage	34°57'49"S 138°30'38"E	microbial	E1_cf_9h	0.03	2021-04-13	E1	2021-04-13	9	0	Dilute	16S
glenelg_wastewater	sewage	34°57'49"S 138°30'38"E	microbial	E1_cf_12h	0.376	2021-04-14	E1	2021-04-13	12	4.5	Dilute	16S
glenelg_wastewater	sewage	34°57'49"S 138°30'38"E	microbial	E1_cf_15h	0.464	2021-04-14	E1	2021-04-13	15	8	Dilute	16S
glenelg_wastewater	sewage	34°57'49"S 138°30'38"E	microbial	E1_cf_18h	0.64	2021-04-14	E1	2021-04-13	18	8.8	Dilute	16S
glenelg_wastewater	sewage	34°57'49"S 138°30'38"E	microbial	B2_cf_3h	0	2021-04-21	B2	2021-04-21	3	0	Dilute	16S
glenelg_wastewater	sewage	34°57'49"S 138°30'38"E	microbial	B2_cf_6h	0.00844	2021-04-21	B2	2021-04-21	6	0	Dilute	16S
glenelg_wastewater	sewage	34°57'49"S 138°30'38"E	microbial	B2_cf_9h	0.0806	2021-04-21	B2	2021-04-21	9	0	Dilute	16S
glenelg_wastewater	sewage	34°57'49"S 138°30'38"E	microbial	B2_cf_12h	0.114	2021-04-22	B2	2021-04-21	12	8	Dilute	16S
glenelg_wastewater	sewage	34°57'49"S 138°30'38"E	microbial	B2_cf_15h	0.138	2021-04-22	B2	2021-04-21	15	13	Dilute	16S
glenelg_wastewater	sewage	34°57'49"S 138°30'38"E	microbial	B2_cf_18h	0.246	2021-04-22	B2	2021-04-21	18	13.5	Dilute	16S
glenelg_wastewater	sewage	34°57'49"S 138°30'38"E	microbial	C2_cf_3h	0.0334	2021-04-21	C2	2021-04-21	3	0	Dilute	16S
glenelg_wastewater	sewage	34°57'49"S 138°30'38"E	microbial	C2_cf_6h	0.0137	2021-04-21	C2	2021-04-21	6	0	Dilute	16S
glenelg_wastewater	sewage	34°57'49"S 138°30'38"E	microbial	C2_cf_9h	0.0814	2021-04-21	C2	2021-04-21	9	0	Dilute	16S
glenelg_wastewater	sewage	34°57'49"S 138°30'38"E	microbial	C2_cf_12h	0.196	2021-04-22	C2	2021-04-21	12	0.5	Dilute	16S
glenelg_wastewater	sewage	34°57'49"S 138°30'38"E	microbial	C2_cf_15h	0.624	2021-04-22	C2	2021-04-21	15	0.5	Dilute	16S
glenelg_wastewater	sewage	34°57'49"S 138°30'38"E	microbial	C2_cf_18h	0.72	2021-04-22	C2	2021-04-21	18	12	Dilute	16S
glenelg_wastewater	sewage	34°57'49"S 138°30'38"E	microbial	D2_cf_3h	0.0131	2021-04-21	D2	2021-04-21	3	0	Dilute	16S
glenelg_wastewater	sewage	34°57'49"S 138°30'38"E	microbial	D2_cf_6h	0.021	2021-04-21	D2	2021-04-21	6	0	Dilute	16S
glenelg_wastewater	sewage	34°57'49"S 138°30'38"E	microbial	D2_cf_9h	0.142	2021-04-21	D2	2021-04-21	9	0	Dilute	16S
glenelg_wastewater	sewage	34°57'49"S 138°30'38"E	microbial	D2_cf_12h	0	2021-04-22	D2	2021-04-21	12	5.5	Dilute	16S
glenelg_wastewater	sewage	34°57'49"S 138°30'38"E	microbial	D2_cf_15h	0.0384	2021-04-22	D2	2021-04-21	15	5.5	Dilute	16S
glenelg_wastewater	sewage	34°57'49"S 138°30'38"E	microbial	D2_cf_18h	0.202	2021-04-22	D2	2021-04-21	18	10	Dilute	16S
glenelg_wastewater	sewage	34°57'49"S 138°30'38"E	microbial	E2_cf_3h	0.128	2021-04-21	E2	2021-04-21	3	0	Dilute	16S
glenelg_wastewater	sewage	34°57'49"S 138°30'38"E	microbial	E2_cf_6h	0.0316	2021-04-21	E2	2021-04-21	6	0	Dilute	16S
glenelg_wastewater	sewage	34°57'49"S 138°30'38"E	microbial	E2_cf_9h	0.332	2021-04-21	E2	2021-04-21	9	0	Dilute	16S
glenelg_wastewater	sewage	34°57'49"S 138°30'38"E	microbial	E2_cf_12h	0.0248	2021-04-22	E2	2021-04-21	12	3	Dilute	16S
glenelg_wastewater	sewage	34°57'49"S 138°30'38"E	microbial	E2_cf_15h	0.5	2021-04-22	E2	2021-04-21	15	3	Dilute	16S
glenelg_wastewater	sewage	34°57'49"S 138°30'38"E	microbial	E2_cf_18h	0.101	2021-04-22	E2	2021-04-21	18	8	Dilute	16S
glenelg_wastewater	sewage	34°57'49"S 138°30'38"E	microbial	Inn_R1_r1	0.169	2021-04-14	innoculum_round1	2021-04-13	0	0	Dilute	16S
glenelg_wastewater	sewage	34°57'49"S 138°30'38"E	microbial	Inn_R2_r1	1.25	2021-04-22	innoculum_round2	2021-04-21	0	0	Neat	16S
glenelg_wastewater	sewage	34°57'49"S 138°30'38"E	microbial	Inn_R2_r2	0	2021-04-22	innoculum_round2	2021-04-21	0	0	Dilute	16S
glenelg_wastewater	sewage	34°57'49"S 138°30'38"E	microbial	Inn_R2_r3	1.44	2021-04-22	innoculum_round2	2021-04-21	0	0	Neat	16S
glenelg_wastewater	sewage	34°57'49"S 138°30'38"E	microbial	Inn_R3_r1	1.55	2021-04-16	innoculum_round2	2021-06-15	0	0	Neat	16S
glenelg_wastewater	sewage	34°57'49"S 138°30'38"E	microbial	A3_cf_3h	0	2021-06-15	A3	2021-06-15	3	0	Neat	16S
glenelg_wastewater	sewage	34°57'49"S 138°30'38"E	microbial	A3_cf_6h	0.0574	2021-06-15	A3	2021-05-15	6	0	Neat	16S
glenelg_wastewater	sewage	34°57'49"S 138°30'38"E	microbial	A3_cf_9h	0.272	2021-06-15	A3	2021-04-15	9	0	Neat	16S
glenelg_wastewater	sewage	34°57'49"S 138°30'38"E	microbial	A3_cf_12h	0.466	2021-06-16	A3	2021-03-15	12	5	Neat	16S
glenelg_wastewater	sewage	34°57'49"S 138°30'38"E	microbial	A3_cf_15h	0.994	2021-06-16	A3	2021-02-15	15	5	Neat	16S
glenelg_wastewater	sewage	34°57'49"S 138°30'38"E	microbial	A3_cf_18h	1.02	2021-06-16	A3	2021-01-15	18	5	Neat	16S
glenelg_wastewater	sewage	34°57'49"S 138°30'38"E	microbial	B3_cf_3h	0	2021-06-15	B3	2020-12-15	3	0	Neat	16S
glenelg_wastewater	sewage	34°57'49"S 138°30'38"E	microbial	B3_cf_6h	0	2021-06-15	B3	2020-11-15	6	0	Neat	16S
glenelg_wastewater	sewage	34°57'49"S 138°30'38"E	microbial	B3_cf_9h	0.121	2021-06-15	B3	2020-10-15	9	0	Neat	16S
glenelg_wastewater	sewage	34°57'49"S 138°30'38"E	microbial	B3_cf_12h	0.324	2021-06-16	B3	2020-09-15	12	4	Neat	16S
glenelg_wastewater	sewage	34°57'49"S 138°30'38"E	microbial	B3_cf_15h	0.536	2021-06-16	B3	2020-08-15	15	4	Neat	16S
glenelg_wastewater	sewage	34°57'49"S 138°30'38"E	microbial	B3_cf_18h	1.16	2021-06-16	B3	2020-07-15	18	4	Neat	16S
glenelg_wastewater	sewage	34°57'49"S 138°30'38"E	microbial	C3_cf_3h	0.0106	2021-06-15	C3	2020-06-15	3	0	Neat	16S
glenelg_wastewater	sewage	34°57'49"S 138°30'38"E	microbial	C3_cf_6h	0.077	2021-06-15	C3	2020-05-15	6	0	Neat	16S
glenelg_wastewater	sewage	34°57'49"S 138°30'38"E	microbial	C3_cf_9h	0.107	2021-06-15	C3	2020-04-15	9	0	Neat	16S
glenelg_wastewater	sewage	34°57'49"S 138°30'38"E	microbial	C3_cf_12h	0.137	2021-06-16	C3	2020-03-15	12	3.6	Neat	16S
glenelg_wastewater	sewage	34°57'49"S 138°30'38"E	microbial	C3_cf_15h	0.896	2021-06-16	C3	2020-02-15	15	3.6	Neat	16S
glenelg_wastewater	sewage	34°57'49"S 138°30'38"E	microbial	C3_cf_18h	0.606	2021-06-16	C3	2020-01-15	18	3.6	Neat	16S
glenelg_wastewater	sewage	34°57'49"S 138°30'38"E	microbial	D3_cf_3h	0	2021-06-15	D3	2019-12-15	3	0	Neat	16S
glenelg_wastewater	sewage	34°57'49"S 138°30'38"E	microbial	D3_cf_6h	0.058	2021-06-15	D3	2019-11-15	6	0	Neat	16S
glenelg_wastewater	sewage	34°57'49"S 138°30'38"E	microbial	D3_cf_9h	0.137	2021-06-15	D3	2019-10-15	9	0	Neat	16S
glenelg_wastewater	sewage	34°57'49"S 138°30'38"E	microbial	D3_cf_12h	0.0231	2021-06-16	D3	2019-09-15	12	9.4	Neat	16S
glenelg_wastewater	sewage	34°57'49"S 138°30'38"E	microbial	D3_cf_15h	4.07	2021-06-16	D3	2019-08-15	15	10.5	Neat	16S
glenelg_wastewater	sewage	34°57'49"S 138°30'38"E	microbial	D3_cf_18h	0	2021-06-16	D3	2019-07-15	18	10.5	Neat	16S
glenelg_wastewater	sewage	34°57'49"S 138°30'38"E	microbial	E3_cf_3h	0	2021-06-15	E3	2019-06-15	3	0	Neat	16S
glenelg_wastewater	sewage	34°57'49"S 138°30'38"E	microbial	E3_cf_6h	0.254	2021-06-15	E3	2019-05-15	6	0	Neat	16S
glenelg_wastewater	sewage	34°57'49"S 138°30'38"E	microbial	E3_cf_9h	0.012	2021-06-15	E3	2019-04-15	9	0	Neat	16S
glenelg_wastewater	sewage	34°57'49"S 138°30'38"E	microbial	E3_cf_12h	0.0368	2021-06-16	E3	2019-03-15	12	4.5	Neat	16S
glenelg_wastewater	sewage	34°57'49"S 138°30'38"E	microbial	E3_cf_15h	0.0091	2021-06-16	E3	2019-02-15	15	4.5	Neat	16S
glenelg_wastewater	sewage	34°57'49"S 138°30'38"E	microbial	E3_cf_18h	0.402	2021-06-16	E3	2019-01-15	18	4.5	Neat	16S
